# Supplementary material for: Tart Cherry Increases Lifespan in Caenorhabditis elegans by Altering Metabolic Signaling Pathways
Source: MDPI journal article supplement (doi:10.3390/nu12051482), 2020-05-20
Supplement: s1 [file s1]

## SUPPLEMENTARY TABLES

**Table S1:** The lifespan in wild type *C. elegans* with different concentrations of tart cherry at 20°C.

| Treatment           | Mean $\pm$ SE                 | Median lifespan | Maximum lifespan | Total number of worms |
|---------------------|-------------------------------|-----------------|------------------|-----------------------|
| 0 $\mu\text{g/ml}$  | 13.31 $\pm$ 0.61 <sup>a</sup> | 14              | 19               | 120                   |
| 3 $\mu\text{g/ml}$  | 14.92 $\pm$ 0.58 <sup>a</sup> | 15              | 22               | 120                   |
| 6 $\mu\text{g/ml}$  | 16.83 $\pm$ 0.77 <sup>b</sup> | 17              | 22               | 120                   |
| 12 $\mu\text{g/ml}$ | 16.73 $\pm$ 0.67 <sup>b</sup> | 17              | 21               | 120                   |

Lifespan assay was performed in micro-fluidic devices at 20°C, with (3, 6, or 12  $\mu\text{g/ml}$ ) or without (0  $\mu\text{g/ml}$ ) tart cherry extract. Each device contained 30 chambers and only one worm per chamber. Chambers were washed everyday with nematode growth medium to avoid progenies. Each lifespan experiment was performed 3 independent times with similar results. Values with different letters are significantly different ( $p < 0.05$ ) log rank (Mantel-Cox) test.

**Table S2.** The lifespan in *daf-16* mutant *C. elegans* with different concentrations of tart cherry at 20°C.

| Treatment           | Mean $\pm$ SE    | Median lifespan | Maximum lifespan | Total number of worms |
|---------------------|------------------|-----------------|------------------|-----------------------|
| 0 $\mu\text{g/ml}$  | 13.57 $\pm$ 0.51 | 14              | 18               | 120                   |
| 3 $\mu\text{g/ml}$  | 12.65 $\pm$ 0.43 | 13              | 19               | 103                   |
| 6 $\mu\text{g/ml}$  | 13.96 $\pm$ 0.51 | 12              | 19               | 103                   |
| 12 $\mu\text{g/ml}$ | 14.29 $\pm$ 0.74 | 14              | 19               | 107                   |

Lifespan assay was performed in micro-fluidic devices at 20°C, with (3, 6, or 12  $\mu\text{g/ml}$ ) or without (0  $\mu\text{g/ml}$ ) tart cherry extract. TC extract did not change the mean lifespan of *daf-16 C. elegans* significantly. Each device contained 30 chambers with only one worm per chamber. Chambers were washed everyday with nematode growth medium to avoid progenies. Each lifespan experiment was performed 3 independent times with similar results. Values with different letters are significantly different ( $p < 0.05$ ) log rank (Mantel-Cox) test.

**Table S3.** The lifespan in *aak-2* mutant *C. elegans* with different concentrations of tart cherry at 20°C.

| <b>Treatment</b>               | <b>Mean <math>\pm</math> SE</b> | <b>Median<br/>Lifespan</b> | <b>Maximum<br/>lifespan</b> | <b>Total<br/>number of<br/>worms</b> |
|--------------------------------|---------------------------------|----------------------------|-----------------------------|--------------------------------------|
| <b>0 <math>\mu</math>g/ml</b>  | 15.68 $\pm$ 0.20                | 19                         | 26                          | 90                                   |
| <b>3 <math>\mu</math>g/ml</b>  | 14.83 $\pm$ 0.15                | 18                         | 24                          | 100                                  |
| <b>6 <math>\mu</math>g/ml</b>  | 14.41 $\pm$ 0.18                | 20                         | 24                          | 103                                  |
| <b>12 <math>\mu</math>g/ml</b> | 15.64 $\pm$ 0.83                | 19                         | 23                          | 104                                  |

Lifespan assay was performed in micro-fluidic devices at 20°C, with (3, 6, or 12  $\mu$ g/ml) or without (0  $\mu$ g/ml) tart cherry extract. TC extract did not change the mean lifespan of *aak-2 C. elegans* significantly. Each device contained 30 chambers and only one worm per chamber. Chambers were washed everyday with nematode growth medium to avoid

progenies. Each lifespan experiment was performed 3 independent times with similar results. Values with different letters are significantly different ( $p < 0.05$ ) log rank (Mantel-Cox) test.
